# Supplementary material for: Effects of gas–wall interactions on measurements of semivolatile compounds and small polar molecules
Source: Copernicus journal article supplement (doi:10.5194/amt-12-3137-2019), 2019-06-13
Supplement: Supplementary file 2 [file amt-12-3137-2019-supplement.zip]

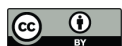

## *Supplement of*

# **Effects of gas–wall interactions on measurements of semivolatile compounds and small polar molecules**

**Xiaoxi Liu et al.**

*Correspondence to:* Jose L. Jimenez ([jose.jimenez@colorado.edu](mailto:jose.jimenez@colorado.edu))

- [amt-12-3137-2019-supplement-title-page.pdf](#)
- [amt-2019-52-supplement](#)
  - SI
    - \* [2019-06-03\\_Tubing\\_XL\\_SI.pdf](#)
    - \* [Fig2.pxp](#)
    - \* [PartitioningDelayModel\\_v2.pxt](#)

The copyright of individual parts of the supplement might differ from the CC BY 4.0 License.
